# Supplementary material
Source: Springer Nature journal article supplement (https://www.springermedizin.de/resource/supplementary/12889_2010_2025_MOESM3_ESM.pdf/9484338)
Supplement: MOESM3 [file 9484338]

| Year                                      | 2009 |    |    |    | 2010 |    |    |    | 2011 |    |    |    | 2012 |    |    |    | 2013 |  |
|-------------------------------------------|------|----|----|----|------|----|----|----|------|----|----|----|------|----|----|----|------|--|
| Activity                                  | Q2   | Q3 | Q4 | Q1 | Q2   |  |
| Study start up*<br>- Darwin<br>- Auckland | →    |    |    |    |      |    |    |    |      |    |    |    |      |    |    |    |      |  |
| Recruitment<br>- Darwin<br>- Auckland     |      |    | →  |    |      |    |    |    |      |    |    |    |      |    |    |    |      |  |
| Follow-up<br>- Darwin<br>- Auckland       |      |    | →  |    |      |    |    |    |      |    |    |    |      |    |    |    |      |  |

\* Funding secured, documents developed, ethics obtained, data management system set-up, staff recruited and trained
